# Supplementary material for: Modulation of Working Memory and Resting-State fMRI by tDCS of the Right Frontoparietal Network
Source: Hindawi journal article supplement (doi:10.1155/2021/5594305), 2021-07-26
Supplement: f1 [file 5594305.f1.pdf]

# Supplementary material

Working memory task during tDCS

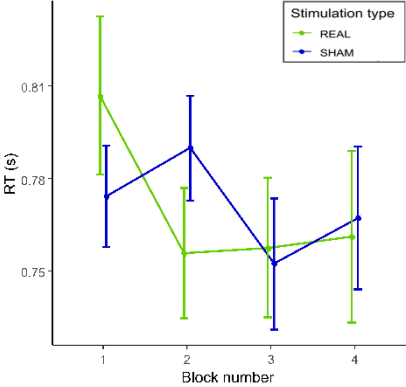

Figure 1: Behavioural results for online WMT (mean  $\pm$  SE)
